# Supplementary material
Source: PubMed Central journal article supplement (PMC1553198)

Histone H2B-mCherry

MAP2C-GFP

PO-PRO-1

Propidium Iodide (white)

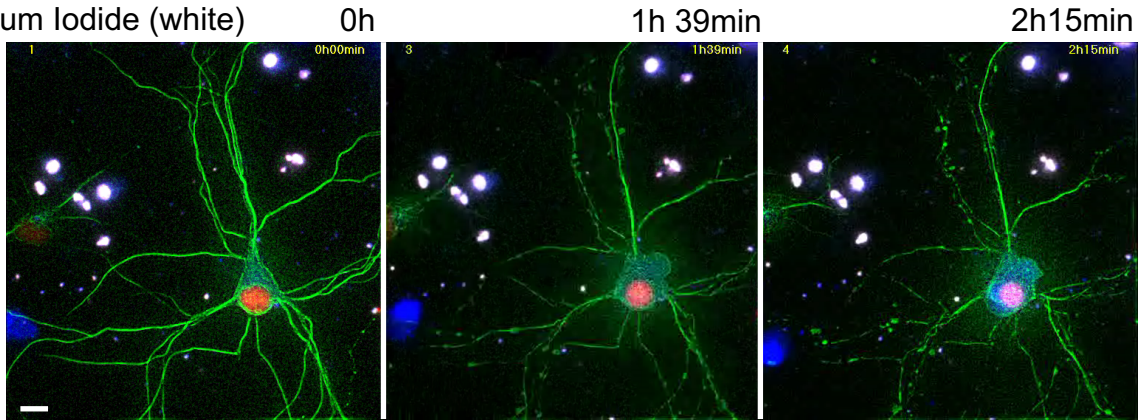

↑  
SNOC added  
at t=1h

soma swelling,  
dendritic swelling

POPRO1 entry

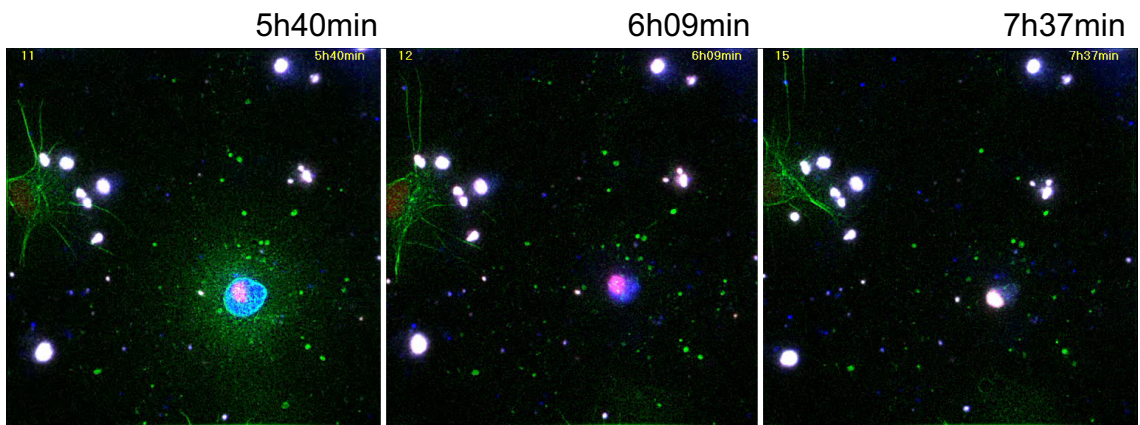

nuclear shrinkage

loss of  
plasma membrane  
integrity - release of  
MAP2C-GFP

PI entry

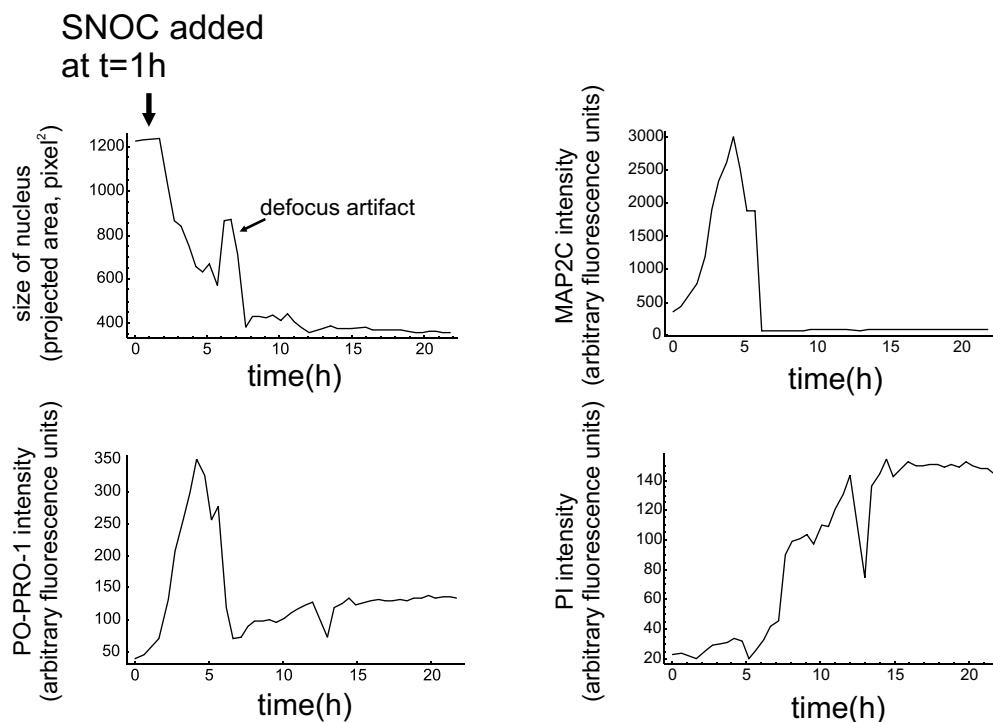

Supplement: 7601253s2.pdf [file 7601253s2.pdf]
