# Supplementary material
Source: PubMed Central journal article supplement (PMC1553198)

mito-mPlum  
MAP2C-GFP  
Histone H2B-CFP

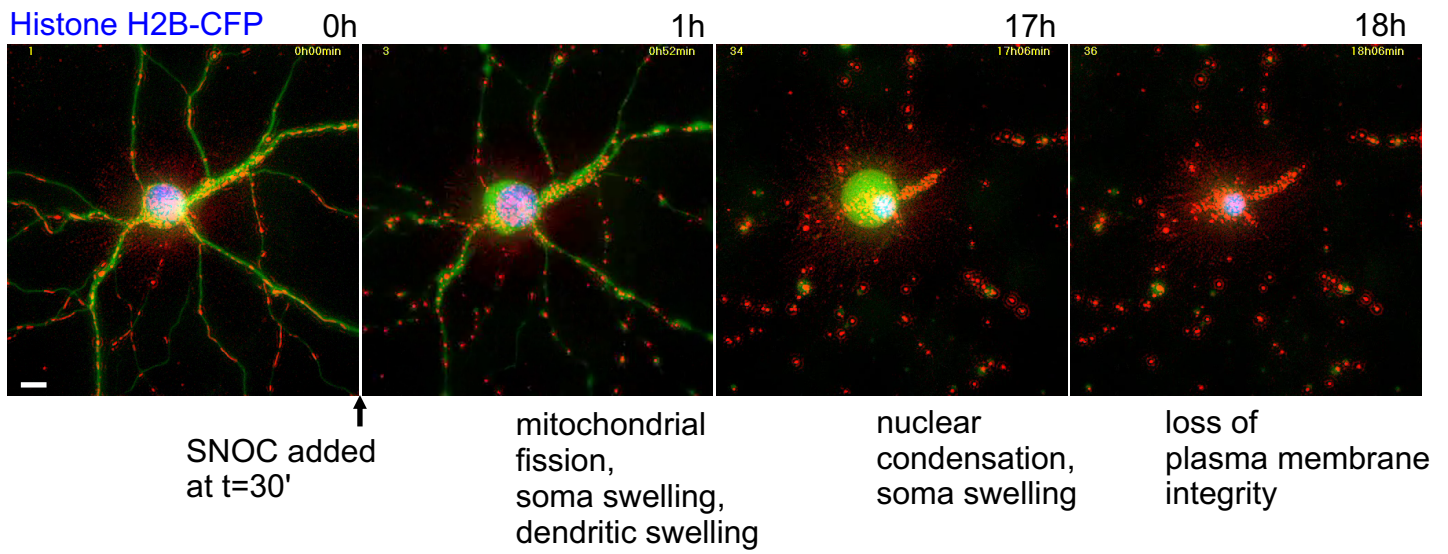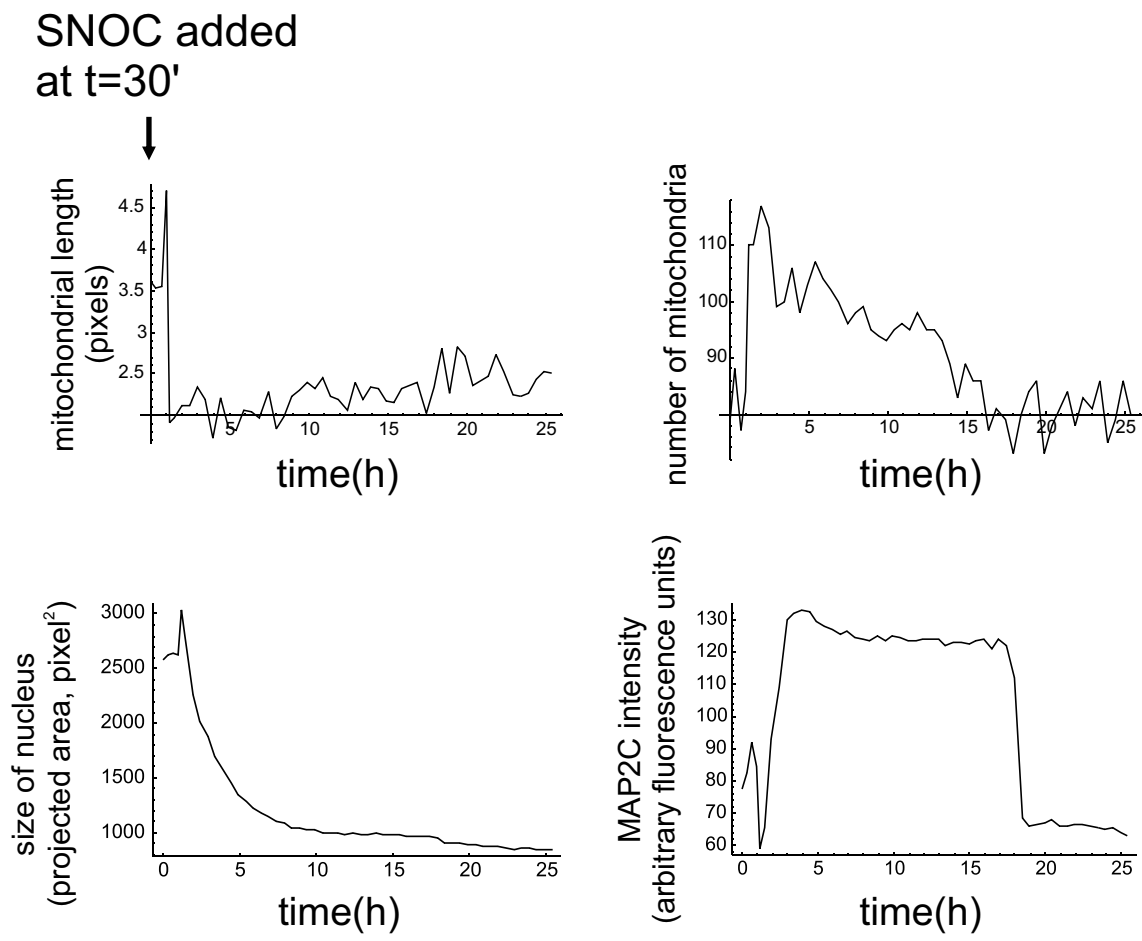

Supplement: 7601253s1.pdf [file 7601253s1.pdf]

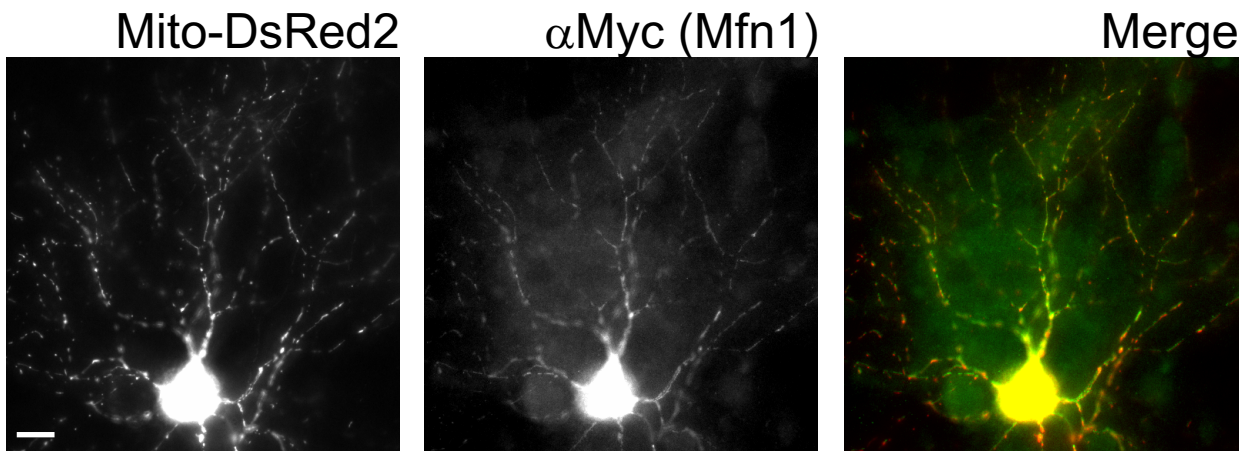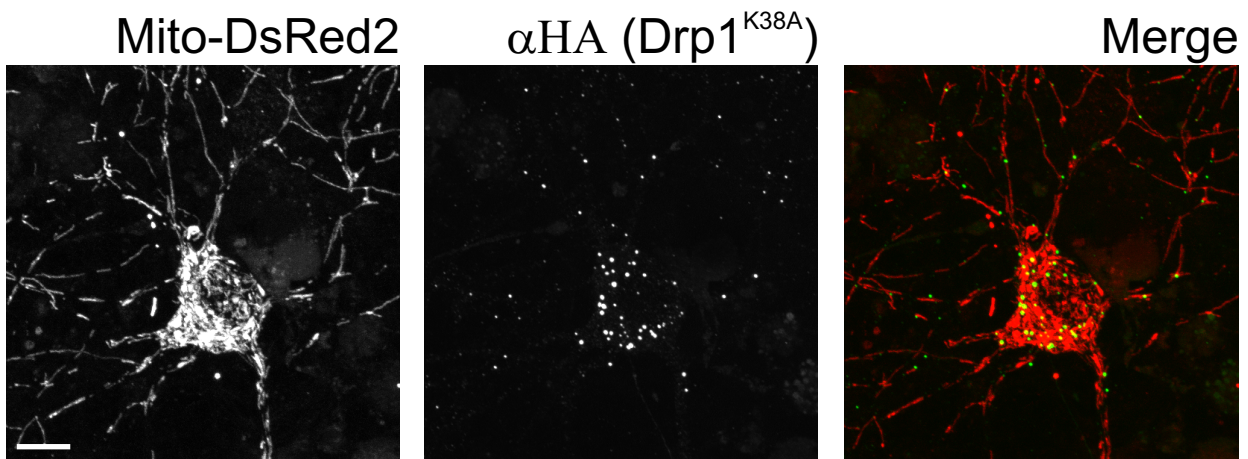

Barsoum et al.  
Supplementary Figure 2

Supplement: 7601253s3.pdf [file 7601253s3.pdf]

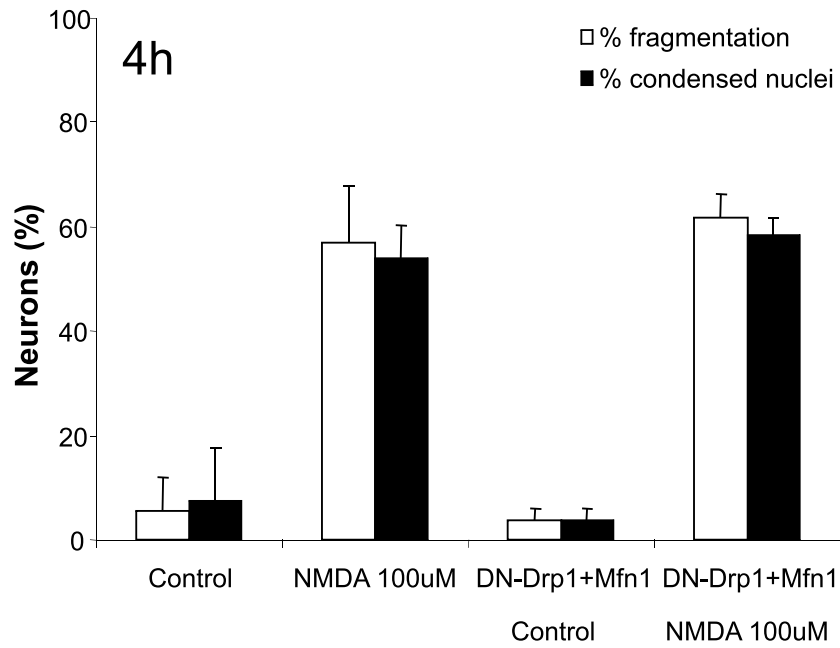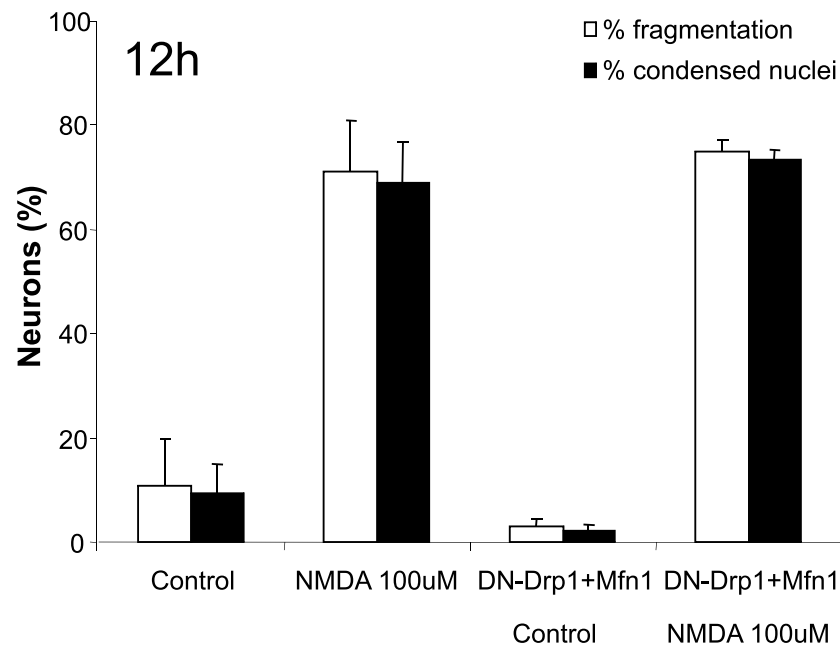

Barsoum et al.  
Supplementary Figure 3

Supplement: 7601253s4.pdf [file 7601253s4.pdf]

## A MitoTracker Red CMXRos

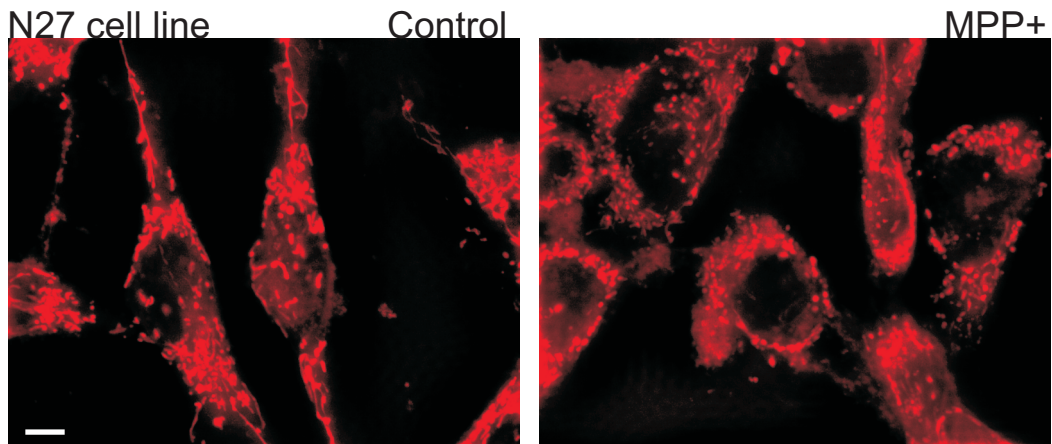

## B Mito-DsRed2

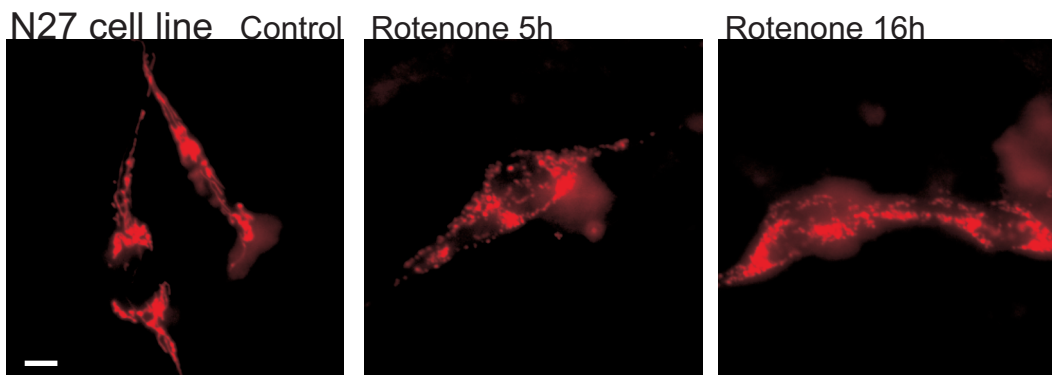

Supplement: 7601253s5.pdf [file 7601253s5.pdf]
